# Supplementary material
Source: JCI journal article supplement (doi:10.1172/jci.insight.162260)
Supplement: sd1 [file 1]

## Supplementary Figures

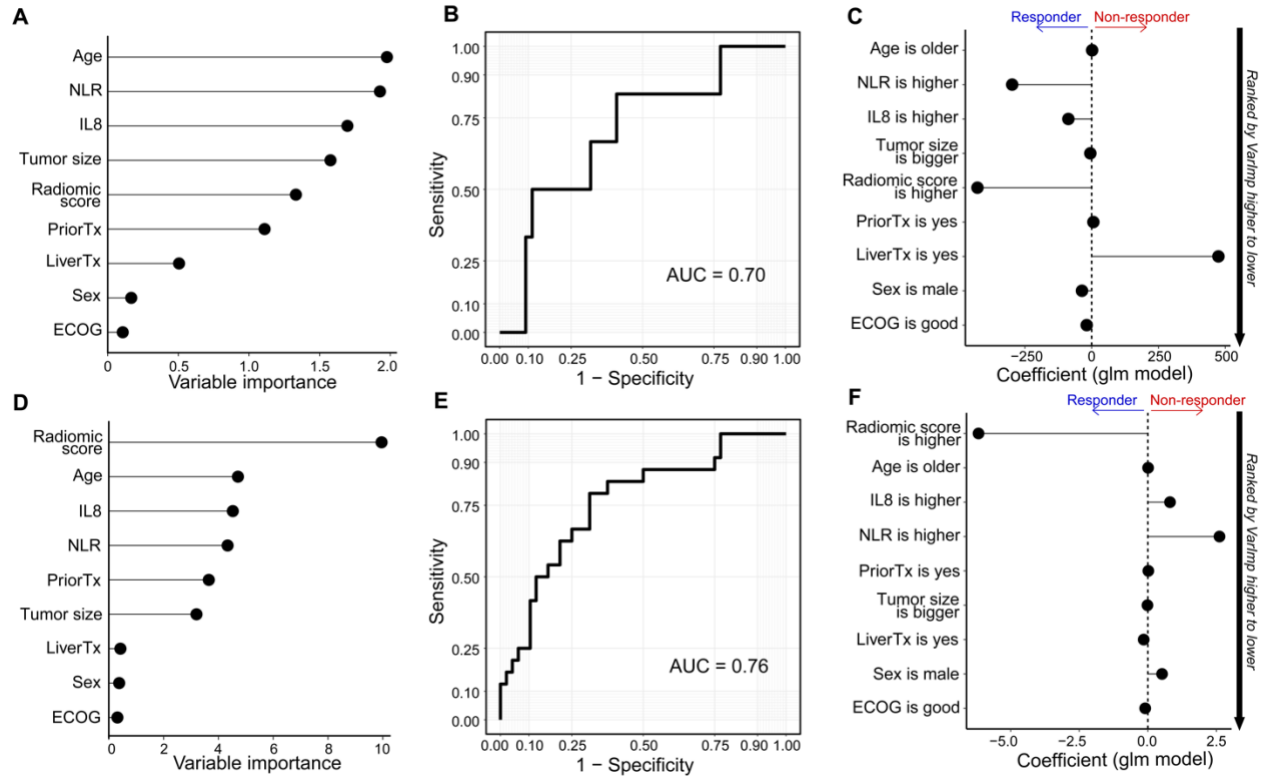

**Figure S1. Multivariable modeling of response stratified by unirradiated (A-C) and irradiated lesions (D-F).** (A) Variable importance (VarImp) of demographic, molecular, and relevant clinical features in distinguishing responders (R) and non-responders (NR) for unirradiated lesions only. (B) Random Forests (RF) machine learning models for R/NR classification with 5-fold cross-validation for unirradiated lesions only. All nine features were included. (C) Directionality of association between R/NR and each feature from (A) estimated by logistic regression model for unirradiated lesions only. Features were ranked by VarImp higher to lower in the same order as shown in (A). (D) VarImp of demographic, molecular, and relevant clinical features in distinguishing R and NR for irradiated lesions only. (E) RF machine learning models for R/NR classification with 5-fold cross-validation for irradiated lesions only.

All nine features were included. **(F)** Directionality of association between R/NR and each feature from **(D)** estimated by logistic regression model for irradiated lesions only. Features were ranked by VarImp higher to lower in the same order as shown in **(D)**.  $n=50$  patients were used for analysis in A-C.  $n=72$  patients were used for analysis in D-F. Patients with missing data or response unavailable were excluded from analysis. AUC, area under curve; Tx, treatment; glm, generalized linear model.

## **Supplementary Tables**

| <b>Covariate</b>                   | <b>P Value</b> |
|------------------------------------|----------------|
| Anatomic Site                      | <0.01          |
| Radiomics Score (continuous)       | 0.02           |
| Partial-Rx vs Complete-Rx          | 0.09           |
| PD-L1 (%)                          | 0.56           |
| Histology                          | 0.18           |
| Age                                | 0.42           |
| ECOG (0 vs 1)                      | 0.45           |
| Number of Prior Systemic Therapies | 0.62           |
| Prior Immunotherapy                | 0.38           |
| Tumor Volume (cc)                  | 0.68           |

**Table S1: Association of local failure and select covariates.** Association between local failure and select covariates was evaluated using t-tests or Wilcoxon rank-sum tests and Pearson's  $\chi^2$  or Fisher's Exact tests for continuous and discrete variables, respectively. Only anatomic site and the radiomics score were found to be associated with local failure.

| Cytokine       | UVA p-value (OS) | UVA p-value (PFS) | MVA p-value (OS) | MVA p-value (PFS) |
|----------------|------------------|-------------------|------------------|-------------------|
| GM-CSF         | 0.73             | 0.71              | 0.40             | 0.35              |
| IFN $\gamma$   | 0.73             | 0.82              | 0.20             | 0.89              |
| IL-10          | 0.74             | 0.80              | 0.69             | 0.69              |
| IL-12.IL-23p40 | 0.74             | 0.62              | 0.25             | 0.23              |
| IL-12p70       | 0.41             | 0.97              | 0.15             | 0.20              |
| IL-13          | 0.73             | 0.71              | 0.33             | 0.88              |
| IL-15          | 0.86             | 0.80              | 0.40             | 0.67              |
| IL-16          | 0.77             | 0.71              | 0.15             | 0.21              |
| IL-17A         | 0.74             | 0.80              | 0.15             | 0.20              |
| IL-1 $\alpha$  | 0.41             | 0.71              | N/A              | N/A               |
| IL-2           | 0.41             | 0.71              | 0.15             | 0.20              |
| IL-4           | 0.05             | 0.03              | 0.09             | 0.02              |
| IL-5           | 0.74             | 0.80              | 0.51             | 0.29              |
| IL-6           | 0.74             | 0.80              | 0.15             | 0.21              |
| IL-7           | 0.86             | 0.80              | 0.25             | 0.36              |
| IL-8           | 0.03             | 0.37              | <0.01            | <0.01             |
| TNF- $\alpha$  | 0.41             | 0.80              | 0.21             | 0.69              |
| TNF- $\beta$   | 0.74             | 0.80              | 0.06             | 0.20              |
| VEGF           | 0.74             | 0.80              | 0.09             | 0.04              |

**Table S2. Pre-treatment serum cytokine correlation with overall survival (OS) and progression-free survival (PFS).** IL-8 was the only cytokine to demonstrate a statistically significant correlation with both overall survival (OS) and progression-free survival (PFS) on univariable (UVA) and multivariable (MVA) testing.
